# Supplementary material
Source: PubMed Central journal article supplement (PMC2917064)

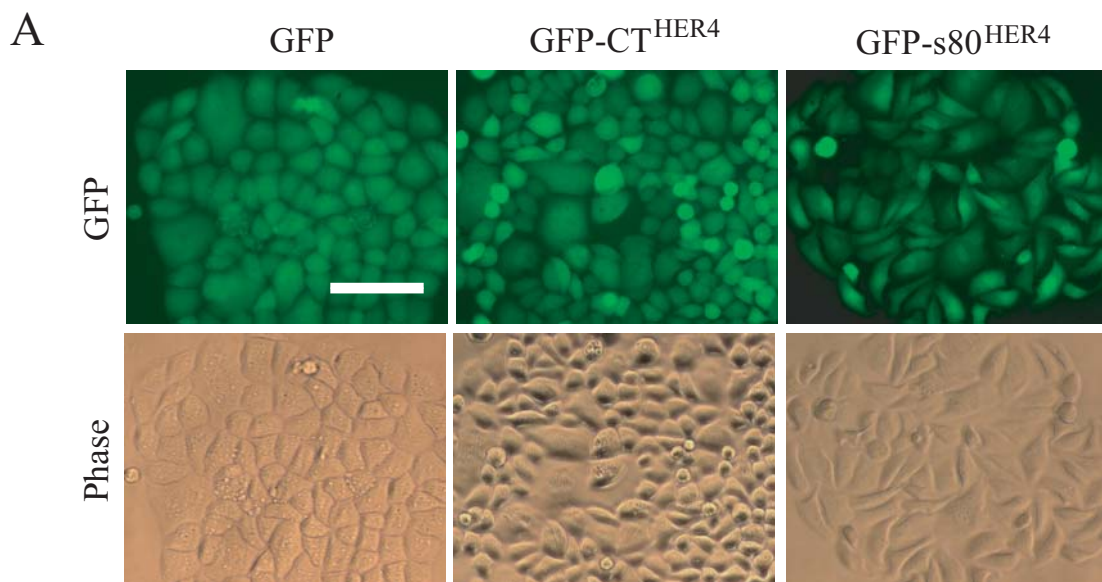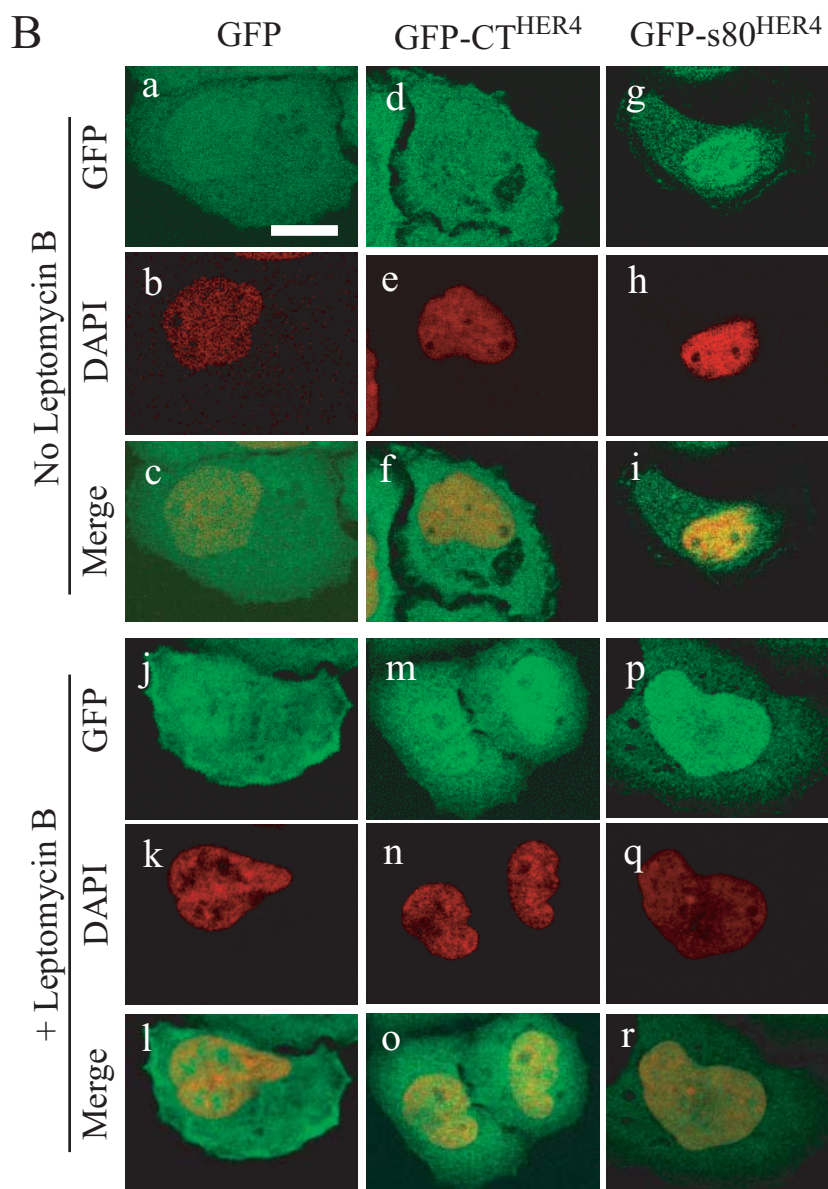

Supplement: NIHMS220816-supplement-1.pdf [file NIHMS220816-supplement-1.pdf]
